# Supplementary material for: Understanding deep dehydrogenation and cracking of n-butane on Ni(111) by a DFT study
Source: Royal Society of Chemistry journal article supplement (doi:10.1039/c9cp05022a), 2019-11-22
Supplement: c9cp05022a1.pdf [file c9cp05022a1.pdf]

# Understanding deep dehydrogenation and cracking of n-butane on Ni (111) surface by a DFT study

Chan Wu<sup>a, b</sup>, Li Wang<sup>a</sup>, Zhouong Xiao<sup>a</sup>, Guozhu Li<sup>\*a</sup>, Lichang Wang<sup>\*b</sup>

<sup>a</sup> Key Laboratory for Green Chemical Technology of Ministry of Education, School of Chemical Engineering and Technology, Collaborative Innovative Center of Chemical Science and Engineering (Tianjin), Tianjin University, Tianjin 300072, China. E-mail: gzli@tju.edu.cn

<sup>b</sup> Department of Chemistry and Biochemistry, Southern Illinois University, Carbondale, Illinois 62901, United States. E-mail: lwang@chem.siu.edu

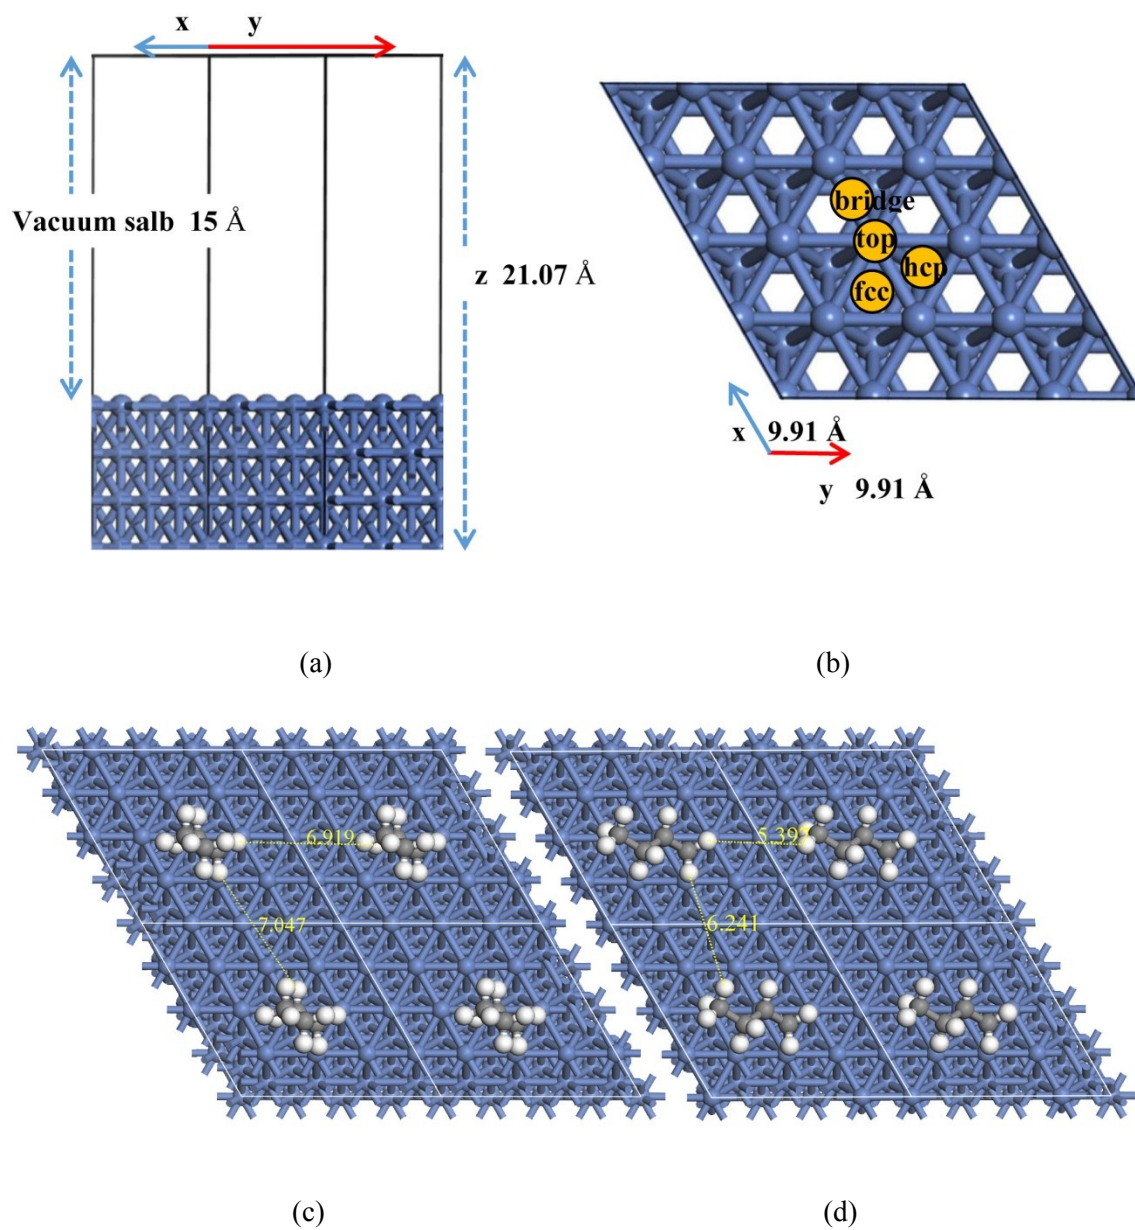

**Fig. S1.** (a) Side view of Ni (111) surface and (b) top view with four adsorption sites on Ni (111) surface; The periodic model of 1-butyl (c) and 1-butane (d) adsorption on Ni (111). White lines are lattice lines, and yellow dotted lines are the closest distances to periodic atoms, distances were labeled. The colors of atoms: Ni is dark blue, C is gray, and H is white.

**Table S1.** ZPE-corrected adsorption energies of  $C_4H_x$  species ( $x = 6-10$ ) on the Ni (111) surface.

|               | Species        | Favored       | $E_{ads}(eV)$ |
|---------------|----------------|---------------|---------------|
| $C_4H_{10}^*$ | n-butane       | Top           | -0.06         |
| $C_4H_9^*$    | 1-butyl        | Fcc           | -1.49         |
|               | 2-butyl        | Top           | -1.00         |
| $C_4H_8^*$    | 1-butene       | Fcc+top       | -0.73         |
|               | trans-2-butene | Bridge        | -0.25         |
|               | 1-butenyl      | Fcc+top       | -2.78         |
| $C_4H_7^*$    | 1-buten-2-yl   | Bridge+bridge | -2.44         |
|               | 2-buten-2-yl   | Bridge+top    | -2.18         |
| $C_4H_6^*$    | 1-butyne       | Fcc+hcp       | -2.29         |
|               | 2-butyne       | Fcc+hcp       | -2.03         |

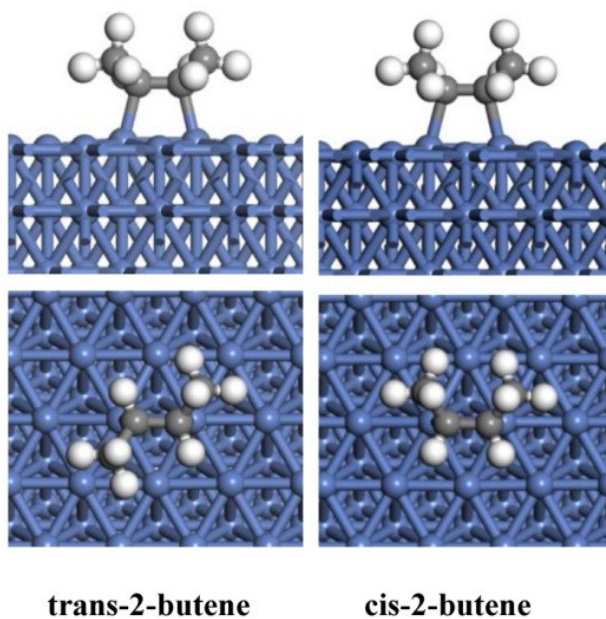

**Fig. S2.** Adsorption configurations of trans-2-butene and cis-2-butene on Ni (111) surface.

**Table S2.** The INCAR file of optimizing n-butane adsorption on Ni (111) surface with DFT used by VASP

|                         |                         |
|-------------------------|-------------------------|
| SYSTEM = n-butane on Ni | EDIFF = 1E-05           |
| NPAR= 4                 | ISMEAR = 1              |
| GGA= PE                 | SIGMA = 0.1             |
| ISTART = 0              | EDIFFG = -0.02          |
| ICHARG = 2              | IBRION = 2              |
| ISIF= 2                 | NSW = 300               |
| ISYM= 0                 | POTIM = 0.2             |
| ISPIN = 2               | LORBIT= 11              |
| ENCUT = 400 eV          | PREC= Accurate          |
| ALGO= Fast              | LCHARG = .F.            |
| NELM = 300              | LWAVE = .F.             |
| NELMIN= 5               | LREAL = Auto            |
| NELMDL= -5              | MAGMOM= 64*0.7 10*0 4*0 |

**Table S3.** The Cartesian coordinates (Å) of optimized n-butane adsorption structure on Ni (111) surface by DFT

| Tag | Atom | X         | Y        | Z         | Tag | Atom | X         | Y        | Z         |
|-----|------|-----------|----------|-----------|-----|------|-----------|----------|-----------|
| 1   | Ni   | 0.000000  | 0.000000 | 0.000000  | 29  | Ni   | 2.476690  | 2.861373 | 4.053756  |
| 2   | Ni   | 0.000000  | 0.000000 | 21.071301 | 30  | Ni   | -2.482121 | 8.583106 | 6.060138  |
| 3   | Ni   | -4.957250 | 8.586209 | 0.000000  | 31  | Ni   | 4.957250  | 0.000000 | 0.000000  |
| 4   | Ni   | -4.957250 | 8.586209 | 21.071301 | 32  | Ni   | 4.957250  | 0.000000 | 21.071301 |
| 5   | Ni   | 9.914500  | 0.000000 | 0.000000  | 33  | Ni   | 0.000000  | 8.586209 | 0.000000  |
| 6   | Ni   | 9.914500  | 0.000000 | 21.071301 | 34  | Ni   | 0.000000  | 8.586209 | 21.071301 |
| 7   | Ni   | 4.957250  | 8.586209 | 0.000000  | 35  | Ni   | 7.435826  | 1.431063 | 2.023688  |
| 8   | Ni   | 4.957250  | 8.586209 | 21.071301 | 36  | Ni   | 4.954033  | 2.861315 | 4.051417  |
| 9   | Ni   | 2.478576  | 1.431063 | 2.023688  | 37  | Ni   | -0.002369 | 8.583473 | 6.063698  |
| 10  | Ni   | -0.001527 | 2.861073 | 4.049055  | 38  | Ni   | 3.717937  | 2.146552 | 0.000000  |
| 11  | Ni   | 4.952471  | 8.583551 | 6.063821  | 39  | Ni   | 3.717937  | 2.146552 | 21.071301 |
| 12  | Ni   | -1.239313 | 2.146552 | 0.000000  | 40  | Ni   | 6.196513  | 3.577616 | 2.023688  |
| 13  | Ni   | -1.239313 | 2.146552 | 21.071301 | 41  | Ni   | 6.194483  | 0.714307 | 4.049674  |
| 14  | Ni   | 8.675188  | 2.146552 | 0.000000  | 42  | Ni   | 3.714801  | 2.141860 | 6.069427  |
| 15  | Ni   | 8.675188  | 2.146552 | 21.071301 | 43  | Ni   | 6.196562  | 2.146552 | 0.000000  |
| 16  | Ni   | 1.239263  | 3.577616 | 2.023688  | 44  | Ni   | 6.196562  | 2.146552 | 21.071301 |
| 17  | Ni   | 1.237135  | 0.715374 | 4.050291  | 45  | Ni   | 3.717888  | 3.577616 | 2.023688  |
| 18  | Ni   | 8.669897  | 2.144718 | 6.061186  | 46  | Ni   | 8.673338  | 0.714504 | 4.050299  |
| 19  | Ni   | 1.239313  | 2.146552 | 0.000000  | 47  | Ni   | 6.195150  | 2.143857 | 6.058682  |
| 20  | Ni   | 1.239313  | 2.146552 | 21.071301 | 48  | Ni   | 7.435875  | 0.000000 | 0.000000  |
| 21  | Ni   | -1.239362 | 3.577616 | 2.023688  | 49  | Ni   | 7.435875  | 0.000000 | 21.071301 |
| 22  | Ni   | 3.716392  | 0.715538 | 4.050542  | 50  | Ni   | 2.478625  | 8.586209 | 0.000000  |
| 23  | Ni   | 1.232105  | 2.142565 | 6.065585  | 51  | Ni   | 2.478625  | 8.586209 | 21.071301 |
| 24  | Ni   | 2.478625  | 0.000000 | 0.000000  | 52  | Ni   | 4.957201  | 1.431063 | 2.023688  |
| 25  | Ni   | 2.478625  | 0.000000 | 21.071301 | 53  | Ni   | 7.433906  | 2.861979 | 4.048838  |
| 26  | Ni   | -2.478625 | 8.586209 | 0.000000  | 54  | Ni   | 2.474792  | 8.584263 | 6.064649  |
| 27  | Ni   | -2.478625 | 8.586209 | 21.071301 | 55  | Ni   | -2.478625 | 4.293105 | 0.000000  |
| 28  | Ni   | -0.000050 | 1.431063 | 2.023688  | 56  | Ni   | -2.478625 | 4.293105 | 21.071301 |

| Tag | Atom | X         | Y        | Z         | Tag | Atom | X        | Y        | Z         |
|-----|------|-----------|----------|-----------|-----|------|----------|----------|-----------|
| 57  | Ni   | 7.435875  | 4.293105 | 0.000000  | 85  | Ni   | 1.239313 | 6.439657 | 21.071301 |
| 58  | Ni   | 7.435875  | 4.293105 | 21.071301 | 86  | Ni   | 3.717888 | 7.870721 | 2.023688  |
| 59  | Ni   | -0.000050 | 5.724168 | 2.023688  | 87  | Ni   | 3.716142 | 5.007420 | 4.051159  |
| 60  | Ni   | -2.480631 | 7.154428 | 4.048885  | 88  | Ni   | 1.235095 | 6.439358 | 6.063241  |
| 61  | Ni   | 7.433079  | 4.291685 | 6.063463  | 89  | Ni   | 3.717937 | 6.439657 | 0.000000  |
| 62  | Ni   | -3.717937 | 6.439657 | 0.000000  | 90  | Ni   | 3.717937 | 6.439657 | 21.071301 |
| 63  | Ni   | -3.717937 | 6.439657 | 21.071301 | 91  | Ni   | 1.239263 | 7.870721 | 2.023688  |
| 64  | Ni   | 6.196563  | 6.439657 | 0.000000  | 92  | Ni   | 6.194333 | 5.007486 | 4.050389  |
| 65  | Ni   | 6.196563  | 6.439657 | 21.071301 | 93  | Ni   | 3.714742 | 6.440101 | 6.062679  |
| 66  | Ni   | -1.239362 | 7.870721 | 2.023688  | 94  | Ni   | 4.957250 | 4.293105 | 0.000000  |
| 67  | Ni   | -1.241911 | 5.008270 | 4.048992  | 95  | Ni   | 4.957250 | 4.293105 | 21.071301 |
| 68  | Ni   | 6.193535  | 6.439035 | 6.062474  | 96  | Ni   | 2.478575 | 5.724168 | 2.023688  |
| 69  | Ni   | -1.239312 | 6.439657 | 0.000000  | 97  | Ni   | 4.955478 | 7.154696 | 4.049755  |
| 70  | Ni   | -1.239312 | 6.439657 | 21.071301 | 98  | Ni   | 4.955105 | 4.293483 | 6.065118  |
| 71  | Ni   | -3.717988 | 7.870721 | 2.023688  | 99  | H    | 4.945692 | 4.191207 | 10.616799 |
| 72  | Ni   | 1.238177  | 5.007913 | 4.049245  | 100 | H    | 4.976858 | 4.291761 | 8.843733  |
| 73  | Ni   | -1.243642 | 6.438334 | 6.063278  | 101 | H    | 3.636490 | 2.015819 | 10.452150 |
| 74  | Ni   | 0.000000  | 4.293105 | 0.000000  | 102 | H    | 2.345645 | 4.243031 | 8.773956  |
| 75  | Ni   | 0.000000  | 4.293105 | 21.071301 | 103 | H    | 2.373570 | 4.231324 | 10.537151 |
| 76  | Ni   | -2.478675 | 5.724168 | 2.023688  | 104 | H    | 1.035661 | 2.084463 | 8.758195  |
| 77  | Ni   | -0.002279 | 7.154597 | 4.050217  | 105 | H    | 0.185908 | 3.331577 | 9.694295  |
| 78  | Ni   | -0.005016 | 4.293465 | 6.057265  | 106 | H    | 5.823624 | 2.966872 | 9.668674  |
| 79  | Ni   | 2.478625  | 4.293105 | 0.000000  | 107 | H    | 1.078610 | 2.036929 | 10.531866 |
| 80  | Ni   | 2.478625  | 4.293105 | 21.071301 | 108 | H    | 3.662289 | 2.137134 | 8.693928  |
| 81  | Ni   | 4.957201  | 5.724168 | 2.023688  | 109 | C    | 4.917287 | 3.589564 | 9.694802  |
| 82  | Ni   | 2.476643  | 7.154412 | 4.050169  | 110 | C    | 3.649404 | 2.745724 | 9.623640  |
| 83  | Ni   | 2.473946  | 4.295514 | 6.065362  | 111 | C    | 2.362404 | 3.567634 | 9.654635  |
| 84  | Ni   | 1.239313  | 6.439657 | 0.000000  | 112 | C    | 1.097296 | 2.715660 | 9.664528  |

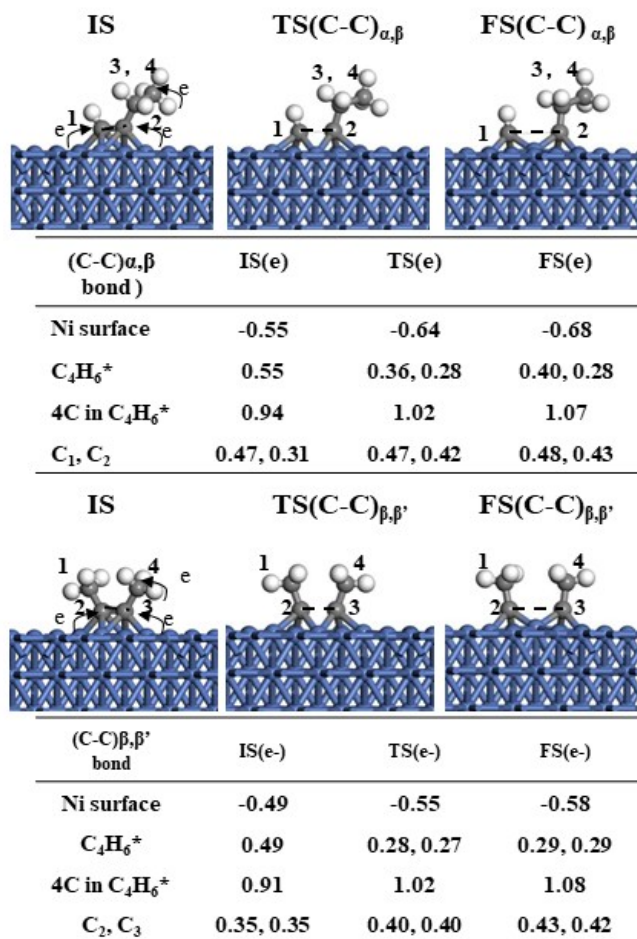

**Fig. S3.** Bader charge analysis of cleavage (C-C)<sub>α,β</sub> and (C-C)<sub>β,β'</sub> bonds on Ni (111) . “+” and “-” refer to accumulation and depletion of electron, respectively. C<sub>4</sub>H<sub>6</sub>\* represents electrons of fragment in TS and

FS.
